SEQUENCE CAPTURE OF AVIAN BLOOD PARASITES

1 Genomic sequence capture of haemosporidian parasites: Methods and prospects for enhanced  
2 study of host-parasite evolution

3

4 Lisa N. Barrow<sup>1\*</sup>, Julie M. Allen<sup>2</sup>, Xi Huang<sup>3</sup>, Staffan Bensch<sup>3</sup>, Christopher C. Witt<sup>1</sup>

5

6 <sup>1</sup>Museum of Southwestern Biology and Department of Biology, MSC03 2020, 1 University of  
7 New Mexico, Albuquerque, New Mexico, 87131-0001, USA

8 <sup>2</sup>Department of Biology, University of Nevada, Reno, Nevada, 89557, USA

9 <sup>3</sup>Department of Biology, Molecular Ecology and Evolution Laboratory, Lund University, SE-223  
10 62, Lund, Sweden

11

12 \*Corresponding Author: Lisa N. Barrow, E-mail: [lnbarrow@unm.edu](mailto:lnbarrow@unm.edu)

13

14 **Abstract**

15 Avian malaria and related haemosporidians (*Plasmodium*, [*Para*] *Haemoproteus*, and  
16 *Leucocytozoon*) represent an exciting multi-host, multi-parasite system in ecology and  
17 evolution. Global research in this field accelerated after 1) the publication in 2000 of PCR  
18 protocols to sequence a haemosporidian mitochondrial (mtDNA) barcode, and 2) the  
19 development in 2009 of an open-access database to document the geographic and host ranges of  
20 parasite mtDNA haplotypes. Isolating haemosporidian nuclear DNA from bird hosts, however,  
21 has been technically challenging, slowing the transition to genomic-scale sequencing techniques.  
22 We extend a recently-developed sequence capture method to obtain hundreds of haemosporidian  
23 nuclear loci from wild bird samples, which typically have low levels of infection, or parasitemia.  
24 We tested 51 infected birds from Peru and New Mexico and evaluated locus recovery in light of  
25 variation in parasitemia, divergence from reference sequences, and pooling strategies. Our  
26 method was successful for samples with parasitemia as low as ~0.03% (3 of 10,000 blood cells  
27 infected) and mtDNA divergence as high as 15.9% (one *Leucocytozoon* sample), and using the  
28 most cost-effective pooling strategy tested. Phylogenetic relationships estimated with >300  
29 nuclear loci were well resolved, providing substantial improvement over the mtDNA barcode.  
30 We provide protocols for sample preparation and sequence capture including custom probe kit  
31 sequences, and describe our bioinformatics pipeline using aTRAM 2.0, PHYLUCE, and custom  
32 Perl and Python scripts. This approach can be applied to the tens of thousands of avian samples  
33 that have already been screened for haemosporidians, and greatly improve our understanding of  
34 parasite speciation, biogeography, and evolutionary dynamics.

35

## SEQUENCE CAPTURE OF AVIAN BLOOD PARASITES

### 36 **Keywords**

37 *Haemoproteus*, avian malaria, hybrid enrichment, *Leucocytozoon*, host-parasite relationships,

38 Apicomplexa

## 39 **Introduction**

40 Multi-host, multi-parasite systems provide extensive opportunities to advance research in  
41 ecology and evolution. Haemosporidians (malaria and relatives, Order Haemosporida), the  
42 intracellular, protozoan parasites that infect vertebrates, are one great example, with studies  
43 ranging in scope from regional and temporal patterns of community turnover (e.g., Fallon *et al.*  
44 2004, 2005; Olsson-Pons *et al.* 2015; Fecchio *et al.* 2017), to host-switching and diversification  
45 across long evolutionary timescales (e.g., Martinsen *et al.* 2008; Ricklefs *et al.* 2014; Galen *et al.*  
46 2018a; Pacheco *et al.* 2018). Avian haemosporidians in particular (genera *Plasmodium*,  
47 [*Para*] *Haemoproteus*, and *Leucocytozoon*) have attracted a large research community seeking to  
48 describe global patterns of diversity, abundance, and host range, and uncover mechanisms  
49 underlying parasite diversification, host-switching, and host susceptibility (e.g., Scheuerlein &  
50 Ricklefs 2004; Bensch *et al.* 2009; Clark *et al.* 2014; Lutz *et al.* 2015). The latter goal has  
51 particular importance for avian conservation, as exemplified by the Hawaiian honeycreepers,  
52 which have been severely impacted by the introduction of avian malaria (van Riper *et al.* 1986;  
53 Atkinson & LaPointe 2009).

54 The detection and description of avian blood parasites have accelerated with the  
55 application of molecular methods. While microscopy of thin blood smears remains essential for  
56 morphological verification and detailed species descriptions (Valkiunas 2005; Valkiūnas *et al.*  
57 2008), the field benefited substantially from the development of PCR primers for avian  
58 haemosporidians (Bensch *et al.* 2000; Fig. 1). Subsequent nested PCR protocols based on these  
59 primers (Hellgren *et al.* 2004; Waldenström *et al.* 2004) enable researchers to amplify and  
60 sequence a mitochondrial (mtDNA) barcode fragment, 478 base pairs of cytochrome *b* (*cytb*),  
61 from avian blood or tissue samples, even when infection levels (i.e., parasitemia) are too low to

## SEQUENCE CAPTURE OF AVIAN BLOOD PARASITES

62 detect by microscopy. Parasite barcode sequences can then be compared with and uploaded to the  
63 avian haemosporidian database, MalAvi (Bensch *et al.* 2009). The growth of this database over  
64 the last decade has allowed for global analyses of parasite distributions and community assembly  
65 (Clark *et al.* 2014, 2017; Clark 2018; Ellis & Bensch 2018). It has become clear, however, that  
66 incorporating multiple nuclear loci will be necessary to further advance haemosporidian research.

67 Relatively few studies thus far have included multi-locus nuclear data of haemosporidian  
68 parasites (Fig. 1). Studies demonstrate that the *cytb* barcode provides limited resolution; a single  
69 *cytb* haplotype can include multiple cryptic species (Falk *et al.* 2015; Galen *et al.* 2018b), and  
70 phylogenies estimated from multiple nuclear loci substantially improve inferences of  
71 evolutionary relationships (Borner *et al.* 2016; Galen *et al.* 2018a). Several challenges, however,  
72 have previously prevented any large-scale efforts to obtain genomic data from avian  
73 haemosporidians. In contrast to mammalian red blood cells, avian red blood cells are nucleated,  
74 and the ratio of host to parasite DNA can be as high as a million to one (Perkins 2014). High-  
75 throughput sequencing of genomic DNA from avian samples is thus inefficient. Isolation of  
76 parasite gametocytes is possible through laser microdissection microscopy (Palinauskas *et al.*  
77 2010), though this process is time-consuming and requires sufficient material. Parasite and host  
78 DNA can also be separated by inducing *in vitro* exflagellation of gametocytes, followed by  
79 centrifugation (Palinauskas *et al.* 2013), but donor birds with fairly high levels of infection are  
80 needed. Furthermore, avian haemosporidians are highly divergent from one another, with mtDNA  
81 barcode divergences between genera of ~10–20%, making the task of designing general primers  
82 for multiple nuclear loci somewhat intractable. An ideal method would: 1) work on any sample  
83 that contained preserved DNA, including the tens of thousands of frozen blood and tissue samples  
84 that have been screened for haemosporidians, 2) be broadly applicable across a diverse group of

## SEQUENCE CAPTURE OF AVIAN BLOOD PARASITES

85 haemosporidian parasites, and 3) enable cost-effective sequencing of hundreds of haemosporidian  
86 nuclear loci.

87       Sequence-capture methods used in conjunction with high-throughput sequencing are  
88 rapidly resolving the evolutionary Tree of Life for a variety of vertebrate, invertebrate, and plant  
89 taxa (Faircloth *et al.* 2012; Lemmon *et al.* 2012; Buddenhagen *et al.* 2016; Hamilton *et al.* 2016;  
90 Faircloth 2017; Quattrini *et al.* 2018). These techniques allow for the enrichment of genomic  
91 regions of interest by hybridizing oligonucleotide probes to genomic samples and removing non-  
92 target regions prior to sequencing (Albert *et al.* 2007; Gnirke *et al.* 2009). Probe sets can be  
93 designed from any existing genomic resources and are often useful across divergent taxa,  
94 although locus recovery tends to decline with increasing levels of divergence (Lemmon *et al.*  
95 2012; Huang *et al.* 2018). The first genome for an avian *Haemoproteus* parasite was published in  
96 2016 (Bensch *et al.* 2016), and no genomes for *Leucocytozoon* are available thus far. Given the  
97 vast differences between bird and haemosporidian genomes, the prospects are promising for  
98 targeted sequence capture of parasite genes from infected bird samples.

99       Huang *et al.* (2018) applied the first sequence-capture assay to haemosporidians,  
100 including eight *Haemoproteus* and one *Plasmodium* lineage, primarily from Europe and Asia.  
101 They successfully sequenced >100 nuclear exons from samples with up to ~6% mtDNA  
102 divergence from the reference, *H. tartakovskiyi*. It is not yet known, however, whether this  
103 approach will be useful for sequencing low-level infections that are most commonly observed in  
104 naturally infected birds. The minimum parasitemia tested in Huang *et al.* (2018) was 0.25%,  
105 while most naturally infected birds exhibit parasitemia less than 0.1% (Atkinson *et al.* 2001;  
106 Zehntindjiev *et al.* 2008; Ishtiaq *et al.* 2017). It is possible that when parasitemia is too low,  
107 parasite DNA will be overwhelmed by host bird DNA.

## SEQUENCE CAPTURE OF AVIAN BLOOD PARASITES

108           Our primary goal was to design a cost-effective sequence capture assay to work broadly  
109 across the genus *Haemoproteus* because of its global abundance, diversity, and variation in host  
110 specificity. Secondly, we include promising results from a single *Leucocytozoon* sample, and  
111 generate nuclear sequences for this genus that can be incorporated into subsequent probe designs.  
112 Our specific objectives were to: 1) describe the relationship between parasitemia levels and  
113 sequence-capture success, 2) test how sequence-capture success is affected by percent divergence  
114 from the reference sequences used for probe design, and 3) compare strategies for pooling  
115 samples before capture to increase cost-effectiveness. To facilitate use of this method by  
116 scientists studying avian haemosporidians, we provide detailed laboratory protocols, including  
117 probe-kit sequences. We also describe our bioinformatics pipeline using aTRAM 2.0 (Allen *et al.*  
118 2015, 2018) for locus assembly, and PHYLUCE (Faircloth 2015) and custom PERL and Python  
119 scripts for downstream processing.

120

### 121 **Materials and Methods**

#### 122 *Locus selection and probe design*

123           The recently sequenced genome of *H. tartakovskiyi* was used for initial probe design and  
124 sequence capture, targeting 1,000 genes (Bensch *et al.* 2016; Huang *et al.* 2018). We used the  
125 parasite-enriched sequences from three *Haemoproteus* species produced with this initial probe kit  
126 as references to design the probe kit used in this study. These three species provide representative  
127 variation across a large portion of the *Haemoproteus* phylogeny, with up to 6.5% sequence  
128 divergence in the mtDNA *cytb* barcode between them.

129           Paired reads obtained from *H. tartakovskiyi* (lineage SISKIN1, sample ID 126/11c), *H.*  
130 *majoris* (PARUS1, 1ES86798), and *H. nucleocondensus* (GRW01, 512022) captures were

## SEQUENCE CAPTURE OF AVIAN BLOOD PARASITES

131 trimmed, set as paired reads, and mapped to the initial 1,000 *H. tartakovskiyi* genes in Geneious  
132 8.1.9 (Biomatters Ltd). We selected 498 loci that were successfully captured and sequenced for at  
133 least one of the non-*tartakovskiyi* samples, using a threshold of 3X coverage with no mismatches  
134 and alignment lengths of at least 200 base pairs (bp) as cutoffs for success. Most loci (471 out of  
135 498) included three reference species, and the average alignment lengths were 1,251 bp (range:  
136 232–8,319; total targeted bp: 622,788; Supplementary Table S1). Locus alignments of the three  
137 species were submitted to MYcroarray (now Arbor Biosciences, Ann Arbor, MI) for design and  
138 synthesis of a custom MYbaits kit with 19,973 biotinylated RNA probes and 2X tiling.

139

### 140 *Sample selection and quantification*

141 We selected 51 bird samples for sequence capture; 50 with putative single infections of  
142 known *Haemoproteus* lineages and one with a mixed infection of *Leucocytozoon* and  
143 *Haemoproteus*. All samples consisted of pectoral muscle previously collected from wild birds in  
144 Peru or New Mexico, USA in accordance with approved animal care guidelines and permits.  
145 Samples were stored at -80°C in the Museum of Southwestern Biology Division of Genomic  
146 Resources at the University of New Mexico. Genomic DNA was extracted using an Omega Bio-  
147 tek EZNA Tissue DNA Kit following manufacturer protocols. For initial assessment of infection,  
148 three nested PCR protocols were used to maximize detection of all three parasite genera  
149 (Hellgren *et al.* 2004; Waldenström *et al.* 2004). Positive infections were identified by visualizing  
150 PCR products on an agarose gel, and haplotypes were assigned by sequencing the 478-base pair  
151 haemosporidian mtDNA barcode (*cytb*), as described in Marroquin-Flores *et al.* (2017). We chose  
152 samples infected with 14 *Haemoproteus* lineages (9 Peru, 5 New Mexico) and one *Leucocytozoon*  
153 lineage from Peru for subsequent quantification, capture, and sequencing (Table 1; Table S2).



## SEQUENCE CAPTURE OF AVIAN BLOOD PARASITES

154 Overall sample DNA concentrations were quantified using a Qubit 3.0 Fluorometer.  
155 Relative parasite DNA concentrations were assessed using quantitative PCR with primers  
156 targeting a 154-base pair portion of haemosporidian ribosomal RNA (Fallon *et al.* 2003). We  
157 used 2X iTaq Universal SYBR Green Supermix (Bio-Rad), 0.5  $\mu$ M of each primer (343F and  
158 496R), and 30 ng sample DNA in a total reaction volume of 20  $\mu$ L. Reactions were run on a Bio-  
159 Rad CFX96 Real-Time PCR System with the following temperature profile: 95 °C for 3 min, 40  
160 cycles of 95 °C for 15 sec and 57°C for 1 min, followed by a melt curve analysis (47 °C to 95 °C  
161 at 0.5 °C and 5 sec per cycle). Each plate included three no-template controls. To generate a  
162 standard curve, we made a six-step 1:10 serial dilution (30–0.0003 ng DNA per well) of one  
163 sample with high parasitemia as estimated by microscopy (NK168012; 1.86% cells infected).  
164 Each sample was run in triplicate and cycle threshold (CT) values were averaged across the three  
165 replicates.

166

### 167 *Library preparation, capture, and sequencing*

168 We prepared libraries for each sample using the KAPA Hyper Prep Kit (Kapa  
169 Biosystems) and dual-indexing with the iTru system (Faircloth & Glenn 2012; Glenn *et al.* 2016;  
170 baddna.uga.edu). Complete protocols are provided in Supporting Information. Briefly, genomic  
171 DNA was visualized on an agarose gel to verify high molecular weight and determine a suitable  
172 sonication protocol. Samples were then fragmented to a length distribution centered on ~500 bp  
173 using a Covaris M220 Focused-ultrasonicator (Covaris, Inc.). Libraries were prepared primarily  
174 following the KAPA Hyper Prep Kit protocols, using 250 ng of fragmented DNA per sample,  
175 custom indexed adapters, KAPA Pure Beads for bead clean-ups, and 10 cycles in the indexing  
176 amplification step. After quantifying libraries by Qubit, equal amounts of sample libraries were

## SEQUENCE CAPTURE OF AVIAN BLOOD PARASITES

177 combined in pools of eight, four, two, or a single sample for capture. We only pooled libraries  
178 with similar parasitemia values as determined by qPCR in an attempt to obtain even capture  
179 success and sequencing coverage across samples within a pool. Capture pools contained 1–2  $\mu$ g  
180 DNA (at least 125 ng per library).

181 Hybrid enrichment was performed following the MYbaits Version 3.02 protocols with  
182 minor modifications as follows. Block Mix 3 was prepared from custom oligos for the iTru dual-  
183 indexing system, and Chicken Hybloc DNA (Applied Genetics Laboratories, Inc.) was used as  
184 Block Mix 1. We extended the hybridization time to 36–40 hr, as recommended to increase  
185 capture efficiency for low-abundance targets. For the post-capture amplification, we used 2X  
186 KAPA HiFi HotStart ReadyMix with the bead-bound library and the following thermal profile:  
187 98 °C for 2 min, 16 cycles of 98 °C for 20 sec, 60 °C for 30 sec, and 72 °C for 60 sec, followed  
188 by a final extension at 72 °C for 5 min and held at 4 °C. Post amplification, we removed the  
189 beads and performed a final 1.2X KAPA Pure Bead clean-up. Captured pools were quantified and  
190 characterized by Qubit and an Agilent 2100 Bioanalyzer, and shipped to the Oklahoma Medical  
191 Research Foundation (OMRF) Clinical Genomics Center for final qPCR and sequencing. All  
192 capture pools were combined and run on a single lane of PE150 Illumina HiSeq 3000.

193

### 194 *Bioinformatic processing*

195 Demultiplexed reads for each sample were obtained from the OMRF Clinical Genomics  
196 Center. We trimmed adapters and low-quality bases using default settings in Illumiprocessor  
197 2.0.6 (Faircloth 2013), which provides a wrapper for Trimmomatic (Bolger *et al.* 2014). These  
198 settings include trimming reads with lengths <40 (MINLEN:40), bases at the start of a read with  
199 quality scores <5 (LEADING:5), bases at the end of a read with scores <15 (TRAILING:15), and

## SEQUENCE CAPTURE OF AVIAN BLOOD PARASITES

200 bases in a sliding window where four consecutive bases have an average quality <15  
201 (SLIDINGWINDOW:4:15). We then used the automated Target Restricted Assembly Method,  
202 aTRAM 2.0 (Allen *et al.* 2015, 2018; <http://www.github.com/juliema/aTRAM>) to assemble  
203 haemosporidian parasite genes using the 498 reference *Haemoproteus* gene sequences. This  
204 approach uses local BLAST searches and an iterative approach to produce assemblies for genes  
205 of interest from cleaned read data. We used BLAST 2.7.1 (Altschul *et al.* 1990), Trinity 2.0.6  
206 (Grabherr *et al.* 2011) as the assembler, five iterations, and nucleotide reference sequences from  
207 *H. tartakovskiy* for all individuals. We also conducted two additional tests to improve locus  
208 recovery for individuals with higher divergences from the reference. First, we used amino acid  
209 reference sequences instead of nucleotide for aTRAM assemblies, but found that several bird host  
210 genes were assembled in place of the haemosporidian genes. Second, we used *H. majoris* as the  
211 nucleotide reference, and added the new locus assemblies recovered to the set for further  
212 processing.

213 We next used custom scripts written in Perl and Python (available at  
214 <https://github.com/juliema/>) to keep only the contigs from the last aTRAM iteration, compare and  
215 align them to the translated exon sequences for the reference *H. tartakovskiy* using Exonerate  
216 2.2.0 (Slater & Birney 2005), and stitch together any exons that were broken into multiple contigs  
217 (as described in Allen *et al.* 2017). Because aTRAM performs iterative assemblies that can  
218 extend outward from the original reference sequence, the last iteration is most likely to have the  
219 most complete, longest contigs. For samples where the middle of a locus was either not  
220 sequenced or not recovered due to low coverage, we used exon stitching to retain both ends of the  
221 sequence for alignment. We then conducted a reciprocal best-BLAST check on the stitched  
222 exons, and removed any individual-locus combination for which the top match for the assembled

## SEQUENCE CAPTURE OF AVIAN BLOOD PARASITES

223 locus was not the target locus. For this search, we created a local BLAST database from all 6,436  
224 *H. tartakovskyi* genes (downloaded from <http://mbio-serv2.mbioekol.lu.se/Malavi/Downloads>).  
225 Fewer than 0.2% (9 of 4,507) individual-locus combinations were mismatched and therefore  
226 removed. Prior to multiple sequence alignment, we added sequences for the three reference  
227 species, and used custom Python scripts (available on Dryad) to reformat the aTRAM sequences  
228 for the PHYLUCE pipeline (Faircloth 2015).

229 Several PHYLUCE scripts were used to summarize locus information for each individual,  
230 produce multiple sequence alignments, and generate concatenated datasets for phylogenetic  
231 analysis in RAxML. We considered samples with at least 50 recovered loci to be successful, and  
232 generated alignments including only those individuals. We generated edge-trimmed alignments  
233 with MAFFT 7.130b (Katoh & Standley 2013), using a threshold parameter of 0.3 (at least 30%  
234 of individuals with sequence at the edges) and maximum divergence of 0.4. As one final check,  
235 we manually examined all alignments with at least 50% of taxa (404 alignments), and removed  
236 25 that were poorly-aligned. Concatenated RAxML alignments were generated allowing different  
237 levels of missing data: at least 50, 70, or 90% of individuals per locus.

238

### 239 *Sequence coverage estimation*

240 To provide an estimate of sequence coverage and its influence on capture success, we  
241 used the BLAST-only option in aTRAM to find and count the reads for a parasite mtDNA gene  
242 and a host mtDNA gene for each sample. The *H. tartakovskyi* reference sequence was used to  
243 estimate coverage for the parasite mtDNA *cytb* gene. Given the availability of host bird  
244 sequences on GenBank, we used *ND2* reference sequences (Table S2) to estimate host mtDNA  
245 coverage. Host genes were not targeted by the probe kit, but these non-target reads were

## SEQUENCE CAPTURE OF AVIAN BLOOD PARASITES

246 sequenced as a by-product because of the large quantity of bird mtDNA in the samples. We  
247 estimated per-site coverage based on the length of the reference gene used, assuming 150 base  
248 pair read lengths, and compared the ratio of parasite to host per-site coverage between samples  
249 that were considered capture successes and failures.

250

### 251 *Detection of mixed infections*

252 For each successfully-captured individual, we mapped the cleaned, paired reads to both  
253 *COI* and *cytb* mtDNA reference sequences in Geneious to check for possible co-infections. In  
254 cases where multiple haplotypes were apparent in the mapped read assembly, we compared the  
255 reads to the *cytb* barcode region for the original assigned haplotype to sort out the alternative  
256 haplotype and determine the variant frequency.

257

### 258 *Downstream analysis*

259 To test for effects of multiple variables on sequence capture success, we used generalized  
260 linear models (GLMs) in R (R Core Team 2016). We tested whether parasitemia (qPCR CT  
261 value), level of divergence from the nearest reference (% mtDNA sequence divergence), or the  
262 number of samples pooled (factor with two categories: 8 or <8), had an effect on the number of  
263 loci recovered per sample. We also included the interaction between parasitemia and divergence  
264 from the reference. The one *Leucocytozoon* sample was an outlier for mtDNA divergence, thus  
265 we repeated analyses with and without this individual.

266 To determine whether the nuclear loci we recovered improve inferences of  
267 haemosporidian relationships, we estimated a phylogeny for the samples with sufficient data. We  
268 used PartitionFinder 2 (Lanfear *et al.* 2017) to select appropriate models of nucleotide evolution

## SEQUENCE CAPTURE OF AVIAN BLOOD PARASITES

269 and partitioning schemes for each dataset. Given the number of loci, we used the rcluster  
270 algorithm with RAxML (Stamatakis 2014; Lanfear *et al.* 2014), linked branch lengths, and AICc  
271 for model selection. Phylogenies were estimated for each nuclear dataset (50, 70, 90% complete  
272 matrices), for the mtDNA capture data (3,226 bp of COI and *cytb*), and for the original *cytb*  
273 barcode data (478 bp). We used the rapid hill-climbing algorithm in RAxML with the GTR+G  
274 model and 1000 bootstrap replicates. We also estimated species trees from the nuclear datasets  
275 using SVDquartets (Chifman & Kubatko 2014), implemented in PAUP\* 4.0a163 (Swofford  
276 2002). We performed an exhaustive search of all quartets and conducted multilocus bootstrapping  
277 with 1000 replicates and partitioned loci.

278

### 279 **Results**

#### 280 *Data summary*

281 We obtained 620,951,640 reads from one sequencing lane, of which 571,186,910 (92%)  
282 were sorted by individual barcode. On average, 11.2 million (s.d.:  $\pm 7.2$  million) reads were  
283 obtained per individual (min–max: 3.7–39.3 million; median: 8.7 million). The number of  
284 parasite loci assembled per individual ranged from 491 (99%) to none; eight of the 51 samples  
285 resulted in no *Haemoproteus* loci. We considered 15 samples (29%) to be sequence capture  
286 successes, with  $>70$  loci obtained. The remaining individuals resulted in 11 or fewer loci. For  
287 most of these failures, only one or two mtDNA genes were assembled. For the successful  
288 samples, an average of  $295 \pm 140$  (min–max: 71–491, median: 254) loci were recovered with  
289 mean locus lengths of 2,428 (min–max: 2,317–2,798) bp. The average number of loci assembled  
290 with  $>1,000$  bp in length was  $241 \pm 108$  (min–max: 64–386; median: 212; Fig. S1).

291

## SEQUENCE CAPTURE OF AVIAN BLOOD PARASITES

### 292 *Effects of parasitemia, divergence, and pooling on success*

293 Parasitemia was positively correlated with capture success and locus recovery ( $t = 6.15$ ,  $p$   
294  $< 0.0001$ ; Fig. 2a). Samples with parasitemia values  $>0.07\%$  (~7 out of 10,000 infected cells)  
295 were all successful, and samples with as low as ~0.03% (~3 of 10,000 cells; qPCR CT value ~26)  
296 also resulted in  $>100$  loci. Divergence from the nearest reference was negatively correlated with  
297 locus recovery ( $t = -3.91$ ,  $p = 0.0003$ ; Fig. 2b). There was also a significant interaction between  
298 parasitemia and divergence ( $t = -3.76$ ,  $p = 0.0005$ ). Samples with both sufficient parasitemia and  
299 low divergence from the reference had the best locus recovery ( $>400$  loci). The most divergent  
300 capture success was the *Leucocytozoon* sample, with 15.9% mtDNA divergence from the nearest  
301 reference and 71 loci recovered. GLM results excluding this outlier were qualitatively similar but  
302 stronger in magnitude. The number of samples included in a pool did not affect capture success ( $t$   
303  $= 0.68$ ,  $p = 0.5$ ); several individuals in the most cost-effective, 8-sample pools resulted in  $>100$   
304 sequenced loci.

305

### 306 *Parasite versus host coverage*

307 The estimated depth of sequence coverage per site for parasite mtDNA showed substantial  
308 variation across samples, with a mean of 2,804 reads (min–max: 0.39–45,683). Samples that were  
309 considered capture successes had a mean parasite mtDNA per-site coverage of 9,516 (185–  
310 45,683) and mean host mtDNA coverage of 856 (1.73–2,540). In contrast, samples that were  
311 considered capture failures had a mean parasite mtDNA coverage of only 8.22 (0.39–125), while  
312 host mtDNA coverage was similar with a mean of 957 (0.87–3,110). On average, the ratio of  
313 parasite to host coverage was 137 (0.09–1,622) for capture successes, and only 0.32 (0.0002–  
314 11.15) for capture failures.

## SEQUENCE CAPTURE OF AVIAN BLOOD PARASITES

315

### 316 *Detection of mixed infections*

317         We identified three samples co-infected with multiple lineages, two of which had not been  
318 previously detected by nested PCR and Sanger sequencing. Sample NK168883 was co-infected  
319 with the *Haemoproteus* lineage G009 and a novel *Leucocytozoon* lineage (assigned name G403).  
320 Within the MalAvi barcode region, the frequency of the *Leucocytozoon* lineage dominated the  
321 reads and ranged from 94.8–98.0%. The concatenated sequence for this sample had >15%  
322 sequence divergence from the pure G009 *Haemoproteus* sample (NK168881), indicating that the  
323 genes assembled for that sample belonged to *Leucocytozoon*. Sample NK275890 was co-infected  
324 with two *Haemoproteus* lineages, SPIPAS01 and SIAMEX01 (the read frequency of SIAMEX01  
325 was 11.0–14.2%; mtDNA divergence between the two haplotypes of 6.1%). Sample NK276102  
326 was also co-infected with two *Haemoproteus* lineages, VIGIL05 and VIGIL07 (the read  
327 frequency of VIGIL07 was 30.3–40.5%; mtDNA divergence 3.6%). Phylogenetic analyses were  
328 repeated without the two *Haemoproteus* co-infected samples because the loci extracted by  
329 aTRAM may have represented a composite of the two haplotypes that could not be definitively  
330 sorted.

331

### 332 *Phylogenetic resolution*

333         The nuclear datasets substantially improved phylogenetic resolution of *Haemoproteus*  
334 parasites (Fig. 3). Most relationships were consistent among datasets with different levels of  
335 completeness. The 50% complete matrix included 377 loci and 287,164 bp (Fig. 3a), the 70%  
336 matrix included 206 loci and 189,883 bp, and the 90% matrix included 59 loci and 70,611 bp  
337 (Fig. 3b). The topologies resulting from RAxML and SVDquartets were identical for the 50% and



## SEQUENCE CAPTURE OF AVIAN BLOOD PARASITES

338 70% datasets. The position of *H. tartakovskyi* differed for the 90% matrix RAxML analysis (Fig.  
339 3b), while the SVDquartets topology was consistent with the other datasets. Phylogenetic  
340 analyses excluding the *Haemoproteus* mixed infections resulted in similar topologies, except for  
341 the uncertain position of TROAED12 (Fig. S2). The majority of nodes had high support for the  
342 nuclear datasets; bootstrap values were  $\geq 95$  for 15 (94%) nodes with the 50% matrix and 13  
343 (81%) nodes with the 90% matrix. In contrast, the two-gene mtDNA dataset and the *cytb* barcode  
344 produced poorly-resolved phylogenies for the lineages in our study, inferring very few  
345 relationships with any certainty (Fig. 3c,d). Only 6 (38%) and 3 (19%) of the nodes had bootstrap  
346 values  $\geq 95$ , respectively.

347

### 348 **Discussion**

#### 349 *Capture success and parasitemia*

350 The extremely low abundance of parasite DNA compared to host DNA has presented a  
351 great challenge for obtaining haemosporidian genomic data from naturally-infected birds. We  
352 provide parameters for the successful implementation of a new sequence-capture assay to obtain  
353 hundreds of haemosporidian parasite loci from wild bird samples. By quantifying parasitemia  
354 using either a standard qPCR protocol or microscopic examination, researchers can select  
355 samples above a certain threshold to enable capture success. Based on our results, samples with  
356  $\sim 0.07\%$  parasitemia were always successful, and samples with as low as  $\sim 0.03\%$  parasitemia also  
357 tended to be successful.

358 This finding is exciting because tens of thousands of avian blood and tissue samples exist  
359 in museums and laboratories globally and have already been screened for haemosporidians. Our  
360 results indicate that a large portion of these samples (29% in our study) will be suitable for

## SEQUENCE CAPTURE OF AVIAN BLOOD PARASITES

361 sequence capture of haemosporidian parasites. One possible improvement for sequence capture of  
362 samples with even lower parasitemia is to perform a double enrichment using the haemosporidian  
363 probe kit, in order to increase the relative amount of parasite DNA in the samples further. If a  
364 single sample is captured at a time, parasite and host DNA could accurately be quantified for each  
365 sample with qPCR before and after each enrichment. For a more cost-effective approach,  
366 however, we recommend quantifying parasitemia with qPCR prior to capture, and pooling sample  
367 libraries with similar values as we have done here, in order to obtain more even sequencing  
368 coverage across samples.

369

### 370 *Potential improvements and cost*

371 Our probe kit was designed to work broadly across *Haemoproteus* because of our interest  
372 in the diversity and host range variation of this genus worldwide (Clark *et al.* 2014; Ellis &  
373 Bensch 2018) and the genomic resources available to design probes (Bensch *et al.* 2016; Huang  
374 *et al.* 2018). A clear extension of this method is to incorporate probes targeting all avian  
375 haemosporidian genera. Although we have not yet tested our probe kit on *Plasmodium*-infected  
376 birds, the successful capture and sequencing of >70 loci for *Leucocytozoon* is quite promising  
377 because avian *Plasmodium* is less divergent from *Haemoproteus*. Additional tests on  
378 *Leucocytozoon*- and *Plasmodium*-infected samples with the current probe kit can be carried out to  
379 determine success rates, and the generated sequences can be incorporated into new probe designs  
380 along with new and existing transcriptome and genome data for the other genera (Lutz *et al.*  
381 2016; Videvall *et al.* 2017; Böhme *et al.* 2018).

382 As reference data for more parasite lineages are generated, it will likely be possible to  
383 improve certain steps of our bioinformatics pipeline. We tested two different reference species for

## SEQUENCE CAPTURE OF AVIAN BLOOD PARASITES

384 aTRAM assemblies, and found that the reference chosen for assembly has some effect on the  
385 number of loci recovered; initial locus recovery was better for samples that were less divergent  
386 from the *H. tartakovskyi* reference. We assembled >425 loci (>85%) for the samples with the  
387 lowest divergence from *H. tartakovskyi* (1.7–3% mtDNA divergence), even though they did not  
388 have the highest parasitemia values. For the samples with higher parasitemia but higher  
389 divergences from *H. tartakovskyi* (up to 6.2% for *Haemoproteus* sample), we still recovered more  
390 than 200 loci. We were also able to add 45–60 more loci for these divergent samples by using *H.*  
391 *majoris* as a reference. In aTRAM, protein sequences can be used instead of nucleotide sequences  
392 as references for assembling more divergent loci, but in our case, contamination from host bird  
393 DNA resulted in some gene assemblies for the bird instead of the parasite. One potential work-  
394 around may be to filter reads by GC content prior to assembly, because avian haemosporidian  
395 genomes have lower GC content on average than bird hosts (Galen *et al.* 2018a), but this  
396 potential approach will require further testing.

397         One other challenge for haemosporidian research is that mixed infections are extremely  
398 common in nature. We could be fairly confident that the sequences from the co-infected  
399 *Leucocytozoon* sample did indeed belong to *Leucocytozoon* because we were able to compare  
400 them with a pure infection of the same *Haemoproteus* lineage. The two other co-infected samples  
401 in our study were not unambiguously sorted, but with reference sequences from one or both of the  
402 lineages in a mixed infection, a step could be added to the pipeline to sort them bioinformatically.  
403 One other future improvement to the pipeline will be to incorporate protein-guided multiple  
404 sequence alignments. We chose to manually check our MAFFT alignments and we removed 25  
405 genes (6%) that were poorly-aligned. Because we are targeting exons, protein-guided DNA

## SEQUENCE CAPTURE OF AVIAN BLOOD PARASITES

406 alignments may improve results for more divergent sequences and remove the need for extensive  
407 manual checking.

408         The total cost for our study including DNA extraction, qPCR, library preparation, capture,  
409 and sequencing was approximately \$87 USD per sample, or \$0.30 per locus based on the average  
410 of 295 loci per successful sample. For just library preparation and sequence capture, with eight  
411 libraries pooled before capture, we spent ~\$35 per sample, or \$0.12 per locus. Costs could be  
412 reduced further by ordering larger capture kits or combining more samples together on one  
413 higher-output sequencing platform.

414

### 415 *Future directions for avian haemosporidian research*

416         Avian haemosporidian research has grown at a rapid pace since molecular tools have been  
417 applied to the field. To date, more than 3,100 parasite mtDNA haplotypes have been discovered  
418 and uploaded to the MalAvi database along with their associated locality and host species. Broad  
419 syntheses of these data have provided important insights into global distribution patterns and  
420 host-parasite associations (Clark *et al.* 2014, 2017; Ellis & Bensch 2018), but the improved  
421 resolution of *Haemoproteus* relationships afforded by our genomic sequence capture data has  
422 great potential for moving avian haemosporidian research forward. First, the species limits of  
423 haemosporidian parasites are difficult to define. Some lineages differing by a single nucleotide in  
424 the *cytb* barcode region are considered to be reproductively isolated, biological species (Nilsson  
425 *et al.* 2016), while others are considered to represent intraspecific variants (Outlaw & Ricklefs  
426 2014; Hellgren *et al.* 2015). Galen *et al.* (2018b) used seven nuclear loci to show that both  
427 phenomena occur in *Leucocytozoon*, confirming the poor resolution of mtDNA for inferring  
428 species limits. Second, developing large, multi-locus nuclear DNA sequence datasets is needed to

## SEQUENCE CAPTURE OF AVIAN BLOOD PARASITES

429 advance the study of haemosporidian evolutionary dynamics. Robust phylogenies will allow for  
430 more accurate estimates of biogeographic history (Hellgren *et al.* 2015), trait evolution (Ellis &  
431 Bensch 2018), and transitions between host-generalist and host-specialist strategies (Loiseau *et*  
432 *al.* 2012b). In this way, methods for collecting haemosporidian genomic data will facilitate  
433 detailed studies of parasite diversification, host breadth, and distributional limits across the globe.  
434 Furthermore, high-resolution determination of haemosporidian species limits will be critical to  
435 identify and manage the novel host-parasite interactions that are expected to pose a major threat  
436 to host-species persistence during climate warming (Garamszegi 2011; Loiseau *et al.* 2012a).

437

### 438 **Acknowledgements**

439 This work was supported by NSF DEB-1146491, a New Mexico Ornithological Society research  
440 grant, and an NSF Postdoctoral Fellowship (NSF PRFB-1611710) to LNB. We thank Michael  
441 Andersen, Jenna McCullough, and the staff of the UNM Center for Advanced Research  
442 Computing.

443

444 **References**

- 445
- 446 Albert TJ, Molla MN, Muzny DM *et al.* (2007) Direct selection of human genomic loci by  
447 microarray hybridization. *Nature methods*, **4**, 903–905.
- 448 Allen JM, Boyd B, Nguyen NP *et al.* (2017) Phylogenomics from whole genome sequences using  
449 aTRAM. *Systematic Biology*, **66**, 786–798.
- 450 Allen JM, Huang DI, Cronk QC, Johnson KP (2015) aTRAM - automated target restricted  
451 assembly method: a fast method for assembling loci across divergent taxa from next-  
452 generation sequencing data. *BMC bioinformatics*, **16**, 98.
- 453 Allen JM, LaFrance R, Folk RA, Johnson KP, Guralnick RP (2018) aTRAM 2.0: An Improved,  
454 Flexible Locus Assembler for NGS Data: <https://doi.org/10.1177/1176934318774546>, **14**,  
455 117693431877454.
- 456 Altschul SF, Gish W, Miller W, Myers EW, Lipman DJ (1990) Basic local alignment search tool.  
457 *Journal of Molecular Biology*, **215**, 403–410.
- 458 Atkinson CT, LaPointe DA (2009) Introduced Avian Diseases, Climate Change, and the Future  
459 of Hawaiian Honeycreepers. *Journal of Avian Medicine and Surgery*, **23**, 53–63.
- 460 Atkinson CT, Lease JK, Drake BM, Shema NP (2001) Pathogenicity, serological responses, and  
461 diagnosis of experimental and natural malarial infections in native hawaiian thrushes. *The*  
462 *Condor*, **103**, 209–218.
- 463 Bensch S, Canbäck B, DeBarry JD *et al.* (2016) The Genome of *Haemoproteus tartakovskiyi* and  
464 Its Relationship to Human Malaria Parasites. *Genome Biology and Evolution*, **8**, 1361–1373.
- 465 Bensch S, Hellgren O, Pérez-Tris J (2009) MalAvi: a public database of malaria parasites and  
466 related haemosporidians in avian hosts based on mitochondrial cytochrome b lineages.  
467 *Molecular Ecology Resources*, **9**, 1353–1358.
- 468 Bensch S, Stjernman M, Hasselquist D *et al.* (2000) Host specificity in avian blood parasites: a  
469 study of Plasmodium and Haemoproteus mitochondrial DNA amplified from birds.  
470 *Proceedings of the Royal Society B: Biological Sciences*, **267**, 1583–1589.
- 471 Böhme U, Otto TD, Cotton J *et al.* (2018) Complete avian malaria parasite genomes reveal  
472 features associated with lineage specific evolution in birds and mammals. *Genome research*,  
473 **28**, 547–560.
- 474 Bolger AM, Lohse M, Usadel B (2014) Trimmomatic: A flexible trimmer for Illumina sequence  
475 data. *Bioinformatics*, **30**, 2114–2120.
- 476 Borner J, Pick C, Thiede J *et al.* (2016) Phylogeny of haemosporidian blood parasites revealed by  
477 a multi-gene approach. *Molecular Phylogenetics and Evolution*, **94**, 221–231.
- 478 Buddenhagen C, Lemmon AR, Lemmon EM *et al.* (2016) Anchored Phylogenomics of  
479 Angiosperms I: Assessing the Robustness of Phylogenetic Estimates. *bioRxiv*, doi: [https](https://doi.org/10.1101/068000).
- 480 Chifman J, Kubatko L (2014) Quartet inference from SNP data under the coalescent model.  
481 *Bioinformatics*, **30**, 3317–3324.
- 482 Clark NJ (2018) Phylogenetic uniqueness, not latitude, explains the diversity of avian blood  
483 parasite communities worldwide. *Global Ecology and Biogeography*, 1–12.
- 484 Clark NJ, Clegg SM, Lima MR (2014) A review of global diversity in avian haemosporidians  
485 (Plasmodium and Haemoproteus: Haemosporida): new insights from molecular data.  
486 *International Journal for Parasitology*, **44**, 329–338.
- 487 Clark NJ, Clegg SM, Sam K *et al.* (2017) Climate, host phylogeny and the connectivity of host  
488 communities govern regional parasite assembly. *Diversity and Distributions*, 1–11.

SEQUENCE CAPTURE OF AVIAN BLOOD PARASITES

- 489 Ellis VA, Bensch S (2018) Host specificity of avian haemosporidian parasites is unrelated among  
490 sister lineages but shows phylogenetic signal across larger clades. *International Journal for*  
491 *Parasitology*.
- 492 Faircloth BC (2013) illumiprocessor: a trimmomatic wrapper for parallel adapter and quality  
493 trimming.
- 494 Faircloth BC (2015) PHYLUCE is a software package for the analysis of conserved genomic loci.  
495 *Bioinformatics*, **32**, 786–788.
- 496 Faircloth BC (2017) Identifying conserved genomic elements and designing universal bait sets to  
497 enrich them. *Methods in Ecology and Evolution*, doi: **10.11**.
- 498 Faircloth BC, Glenn TC (2012) Not all sequence tags are created equal: Designing and validating  
499 sequence identification tags robust to indels. *PLoS ONE*, **7**, e42543.
- 500 Faircloth BC, McCormack JE, Crawford NG *et al.* (2012) Ultraconserved elements anchor  
501 thousands of genetic markers spanning multiple evolutionary timescales. *Systematic biology*,  
502 **61**, 717–726.
- 503 Falk BG, Glor RE, Perkins SL (2015) Clonal reproduction shapes evolution in the lizard malaria  
504 parasite *Plasmodium floridense*. *Evolution*, **69**, 1584–1596.
- 505 Fallon SM, Bermingham E, Ricklefs RE (2005) Host Specialization and Geographic Localization  
506 of Avian Malaria Parasites: A Regional Analysis in the Lesser Antilles. *The American*  
507 *Naturalist*, **165**, 466–480.
- 508 Fallon SM, Ricklefs RE, Latta SC, Bermingham E (2004) Temporal stability of insular avian  
509 malarial parasite communities. *Proceedings of the Royal Society B: Biological Sciences*,  
510 **271**, 493–500.
- 511 Fallon SM, Ricklefs RE, Swanson BL, Bermingham E (2003) Detecting Avian Malaria: An  
512 Improved Polymerase Chain Reaction Diagnostic. *Journal of Parasitology*, **89**, 1044–1047.
- 513 Fecchio A, Pinheiro R, Felix G *et al.* (2017) Host community similarity and geography shape the  
514 diversity and distribution of haemosporidian parasites in Amazonian birds. *Ecography*.
- 515 Galen SC, Borner J, Martinsen ES *et al.* (2018a) The polyphyly of *Plasmodium*: comprehensive  
516 phylogenetic analyses of the malaria parasites (order Haemosporida) reveal widespread  
517 taxonomic conflict. *Royal Society Open Science*, **5**, 171780.
- 518 Galen SC, Nunes R, Sweet PR, Perkins SL (2018b) Integrating coalescent species delimitation  
519 with analysis of host specificity reveals extensive cryptic diversity despite minimal  
520 mitochondrial divergence in the malaria parasite genus *Leucocytozoon*. , 1–15.
- 521 Garamszegi LZ (2011) Climate change increases the risk of malaria in birds. *Global Change*  
522 *Biology*, **17**, 1751–1759.
- 523 Glenn TC, Nilsen RA, Kieran TJ *et al.* (2016) Adapterama I: Universal stubs and primers for  
524 thousands of dual-indexed Illumina libraries (iTru & iNext). *bioRxiv*.
- 525 Gnirke A, Melnikov A, Maguire J *et al.* (2009) Solution hybrid selection with ultra-long  
526 oligonucleotides for massively parallel targeted sequencing. *Nat Biotech*, **27**, 182–189.
- 527 Grabherr MG, Haas BJ, Yassour M *et al.* (2011) Full-length transcriptome assembly from RNA-  
528 Seq data without a reference genome. *Nature Biotechnology*, **29**, 644.
- 529 Hamilton CA, Lemmon AR, Lemmon EM, Bond JE (2016) Expanding anchored hybrid  
530 enrichment to resolve both deep and shallow relationships within the spider tree of life. *BMC*  
531 *Evolutionary Biology*, **16**, 212.
- 532 Hellgren O, Atkinson CT, Bensch S *et al.* (2015) Global phylogeography of the avian malaria  
533 pathogen *Plasmodium relictum* based on MSP1 allelic diversity. *Ecography*, **38**, 842–850.

- 534 Hellgren O, Waldenström J, Bensch S (2004) A new PCR assay for simultaneous studies of  
535 Leucocytozoon, Plasmodium, and Haemoproteus from avian blood. *Journal of Parasitology*,  
536 **90**, 797–802.
- 537 Huang X, Hansson R, Palinauskas V *et al.* (2018) The success of sequence capture in relation to  
538 phylogenetic distance from a reference genome: a case study of avian haemosporidian  
539 parasites. *International Journal for Parasitology*, **48**, 893–900.
- 540 Ishtiaq F, Rao M, Huang X, Bensch S (2017) Estimating prevalence of avian haemosporidians in  
541 natural populations: A comparative study on screening protocols. *Parasites and Vectors*, **10**,  
542 1–10.
- 543 Katoh K, Standley DM (2013) MAFFT multiple sequence alignment software version 7:  
544 Improvements in performance and usability. *Molecular Biology and Evolution*, **30**, 772–780.
- 545 Lanfear R, Calcott B, Kainer D, Mayer C, Stamatakis A (2014) Selecting optimal partitioning  
546 schemes for phylogenomic datasets. *BMC evolutionary biology*, **14**, 82.
- 547 Lanfear R, Frandsen PB, Wright AM, Senfeld T, Calcott B (2017) Partitionfinder 2: New  
548 methods for selecting partitioned models of evolution for molecular and morphological  
549 phylogenetic analyses. *Molecular Biology and Evolution*, **34**, 772–773.
- 550 Lemmon AR, Emme SA, Lemmon EM (2012) Anchored hybrid enrichment for massively high-  
551 throughput phylogenomics. *Systematic Biology*, **61**, 727–744.
- 552 Loiseau C, Harrigan RJ, Cornel AJ *et al.* (2012a) First Evidence and Predictions of Plasmodium  
553 Transmission in Alaskan Bird Populations. *PLoS ONE*, **7**, 7–11.
- 554 Loiseau C, Harrigan RJ, Robert A *et al.* (2012b) Host and habitat specialization of avian malaria  
555 in Africa. *Molecular Ecology*, **21**, 431–441.
- 556 Lutz HL, Hochachka WM, Engel JI *et al.* (2015) Parasite prevalence corresponds to host life  
557 history in a diverse assemblage of afrotropical birds and haemosporidian parasites. *PLoS*  
558 *ONE*, **10**.
- 559 Lutz HL, Marra NJ, Grewe F *et al.* (2016) Laser capture microdissection microscopy and genome  
560 sequencing of the avian malaria parasite, Plasmodium relictum. *Parasitology Research*, **115**,  
561 4503–4510.
- 562 Marroquin-Flores RA, Williamson JL, Chavez AN *et al.* (2017) Diversity, abundance, and host  
563 relationships in the avian malaria community of New Mexico pine forests. *PeerJ*, **5**, e3700.
- 564 Martinsen ES, Perkins SL, Schall JJ (2008) A three-genome phylogeny of malaria parasites  
565 (Plasmodium and closely related genera): Evolution of life-history traits and host switches.  
566 *Molecular Phylogenetics and Evolution*, **47**, 261–273.
- 567 Nilsson E, Taubert H, Hellgren O *et al.* (2016) Multiple cryptic species of sympatric generalists  
568 within the avian blood parasite Haemoproteus majoris. *Journal of Evolutionary Biology*, **29**,  
569 1812–1826.
- 570 Olsson-Pons S, Clark NJ, Ishtiaq F, Clegg SM (2015) Differences in host species relationships  
571 and biogeographic influences produce contrasting patterns of prevalence, community  
572 composition and genetic structure in two genera of avian malaria parasites in southern  
573 Melanesia. *Journal of Animal Ecology*, **84**, 985–998.
- 574 Outlaw DC, Ricklefs RE (2014) Species limits in avian malaria parasites (Haemosporida): how to  
575 move forward in the molecular era. *Parasitology*, **141**, 1223–32.
- 576 Pacheco MA, Matta NE, Valkiūnas G *et al.* (2018) Mode and rate of evolution of haemosporidian  
577 mitochondrial genomes: Timing the radiation of avian parasites. *Molecular Biology and*  
578 *Evolution*, **35**, 383–403.



SEQUENCE CAPTURE OF AVIAN BLOOD PARASITES

- 579 Palinauskas V, Dolnik O V, Valkiūnas G, Bensch S (2010) Laser microdissection microscopy  
580 and single cell PCR of avian hemosporidians. *The Journal of parasitology*, **96**, 420–424.
- 581 Palinauskas V, Križanauskienė A, Iezhova TA *et al.* (2013) A new method for isolation of  
582 purified genomic DNA from haemosporidian parasites inhabiting nucleated red blood cells.  
583 *Experimental Parasitology*, **133**, 275–280.
- 584 Perkins SL (2014) Malaria's Many Mates: Past, Present, and Future of the Systematics of the  
585 Order Haemosporida. *The journal of parasitology*, **100**, 11–25.
- 586 Quattrini AM, Faircloth BC, Dueñas LF *et al.* (2018) Universal target-enrichment baits for  
587 anthozoan (Cnidaria) phylogenomics: New approaches to long-standing problems.  
588 *Molecular Ecology Resources*, **18**, 281–295.
- 589 R Core Team (2016) R: A language and environment for statistical computing.
- 590 Ricklefs RE, Outlaw DC, Svensson-Coelho M *et al.* (2014) Species formation by host shifting in  
591 avian malaria parasites. *Proceedings of the National Academy of Sciences of the United*  
592 *States of America*, **111**, 14816–21.
- 593 van Riper C, van Riper SG, Goff ML, Laird M (1986) The Epizootiology and Ecological  
594 Significance of Malaria in Hawaiian Land Birds. *Ecological Monographs*, **56**, 327–344.
- 595 RStudio Team (2016) RStudio: Integrated Development for R.
- 596 Scheuerlein A, Ricklefs RE (2004) Prevalence of blood parasites in European passeriform birds.  
597 *Proceedings of the Royal Society B: Biological Sciences*, **271**, 1363–1370.
- 598 Slater GSC, Birney E (2005) Automated generation of heuristics for biological sequence  
599 comparison. *BMC Bioinformatics*, **6**, 1–11.
- 600 Stamatakis A (2014) RAxML version 8: a tool for phylogenetic analysis and post-analysis of  
601 large phylogenies. *Bioinformatics*, **30**, 1312–1313.
- 602 Swofford DL (2002) PAUP\*. Phylogenetic Analysis Using Parsimony (\*and Other Methods).
- 603 Valkiūnas G (2005) *Avian malaria parasites and other haemosporidia*. CRC Press, Boca Raton,  
604 Florida, USA.
- 605 Valkiūnas G, Iezhova T a, Križanauskienė A *et al.* (2008) A comparative analysis of microscopy  
606 and PCR-based detection methods for blood parasites. *The Journal of Parasitology*, **94**,  
607 1395–401.
- 608 Videvall E, Cornwallis CK, Ahrén D *et al.* (2017) The transcriptome of the avian malaria parasite  
609 *Plasmodium ashfordi* displays host-specific gene expression. *Molecular Ecology*, **26**, 2939–  
610 2958.
- 611 Waldenström J, Bensch S, Hasselquist D, Östman Ö (2004) A New Nested Polymerase Chain  
612 Reaction Method Very Efficient in Detecting Plasmodium and Haemoproteus Infections  
613 from Avian Blood. *Journal of Parasitology*, **90**, 191–194.
- 614 Zehtindjiev P, Ilieva M, Westerdahl H *et al.* (2008) Dynamics of parasitemia of malaria parasites  
615 in a naturally and experimentally infected migratory songbird, the great reed warbler  
616 *Acrocephalus arundinaceus*. *Experimental Parasitology*, **119**, 99–110.
- 617  
618

619 **Data Accessibility**

620  
621 Specimen information is available from the Arctos database (arctosdb.org). Parasite sequences  
622 are available on MalAvi and GenBank (Accession Numbers in Table S2). Protocols and probe  
623 sequences are included as supporting information. Scripts, sequence data, and alignments will be  
624 made available on Dryad.

625  
626

627 **Author Contributions**

628  
629 LNB designed the study, collected the data, and led the writing; LNB and JMA analyzed the data;  
630 XH, SB, and CCW contributed genomic data and resources; all authors edited the manuscript.

SEQUENCE CAPTURE OF AVIAN BLOOD PARASITES

631 **Tables**

632  
633 Table 1 Sampling information for haemosporidian parasite lineages included in the study. All are  
634 *Haemoproteus* except one *Leucocytozoon* (*Leuc*). Additional information for each specimen is  
635 provided in Table S2.  
636

| Parasite lineage     | Study region | N samples | N host species | % mtDNA divergence from <i>H. tartakovskiyi</i> | Nearest reference         | % mtDNA divergence from nearest reference |
|----------------------|--------------|-----------|----------------|-------------------------------------------------|---------------------------|-------------------------------------------|
| G001                 | Peru         | 18        | 18             | 4.1                                             | <i>H. majoris</i>         | 3.77                                      |
| G002                 | Peru         | 5         | 3              | 5.57                                            | <i>H. tartakovskiyi</i>   | 5.57                                      |
| G003                 | Peru         | 2         | 2              | 3.64                                            | <i>H. tartakovskiyi</i>   | 3.64                                      |
| G004                 | Peru         | 2         | 2              | 6.2                                             | <i>H. majoris</i>         | 5.23                                      |
| G005                 | Peru         | 2         | 2              | 2.57                                            | <i>H. tartakovskiyi</i>   | 2.57                                      |
| G006                 | Peru         | 2         | 2              | 3.43                                            | <i>H. tartakovskiyi</i>   | 3.43                                      |
| G007                 | Peru         | 6         | 5              | 3.21                                            | <i>H. tartakovskiyi</i>   | 3.21                                      |
| G009                 | Peru         | 4         | 4              | 3.43                                            | <i>H. tartakovskiyi</i>   | 3.43                                      |
| G011                 | Peru         | 3         | 3              | 3.0                                             | <i>H. tartakovskiyi</i>   | 3.0                                       |
| G403 ( <i>Leuc</i> ) | Peru         | 1         | 1              | 18.0                                            | <i>H. nucleocondensus</i> | 15.9                                      |
| CHOGRA01             | New Mexico   | 1         | 1              | 1.71                                            | <i>H. tartakovskiyi</i>   | 1.71                                      |
| SPIPAS01             | New Mexico   | 2         | 2              | 1.71                                            | <i>H. tartakovskiyi</i>   | 1.71                                      |
| SPISAL01             | New Mexico   | 1         | 1              | 6.0                                             | <i>H. nucleocondensus</i> | 4.81                                      |
| TROAED12             | New Mexico   | 1         | 1              | 5.9                                             | <i>H. majoris</i>         | 3.77                                      |
| VIGIL05              | New Mexico   | 1         | 1              | 4.5                                             | <i>H. majoris</i>         | 3.98                                      |

637  
638  
639  
640  
641

SEQUENCE CAPTURE OF AVIAN BLOOD PARASITES

642 **Figures**

643  
644 Fig. 1 Papers published on 'avian malaria' by year since 1960 (n = 2,066) based on a Web of  
645 Science search (Clarivate Analytics, August 2018). Since 2000, many more 'avian malaria'  
646 papers include 'mitochondrial' (not shown, n = 218) or the barcode gene 'cytochrome *b*' (n =  
647 339) than include 'nuclear' (n = 32).

648  
649  
650

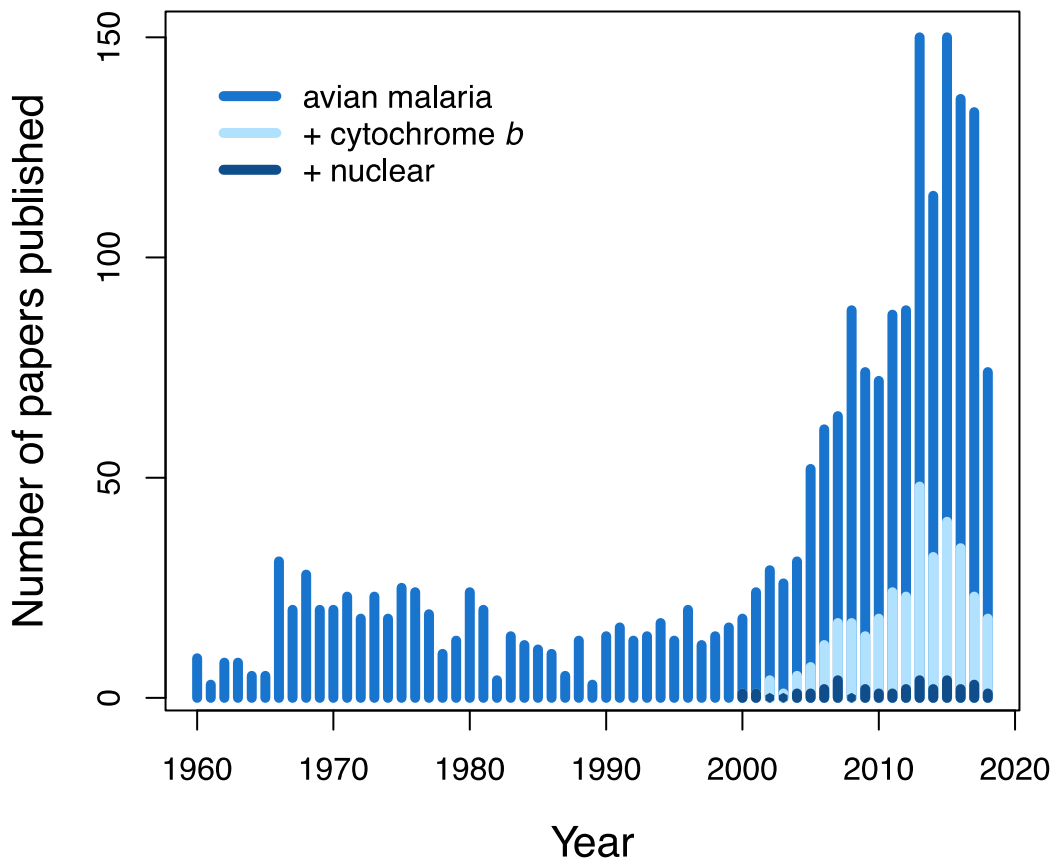

651  
652

SEQUENCE CAPTURE OF AVIAN BLOOD PARASITES

653 Fig. 2 Number of parasite loci sequenced out of 498 total. (a) Locus recovery increased with  
654 parasitemia, shown as % infected cells estimated by microscopic examination of the qPCR  
655 standard. Colors depict % divergence from the nearest reference. (b) Locus recovery decreased  
656 with increasing % divergence from references, but with sufficient parasitemia, divergent samples  
657 were successful. Colors depict parasitemia as the qPCR CT value. The *Leucocytozoon* sample  
658 (15.9% divergent) is not shown in (b) to improve visualization. In both plots, shapes depict the  
659 number of samples in a capture pool, which did not influence locus recovery.  
660

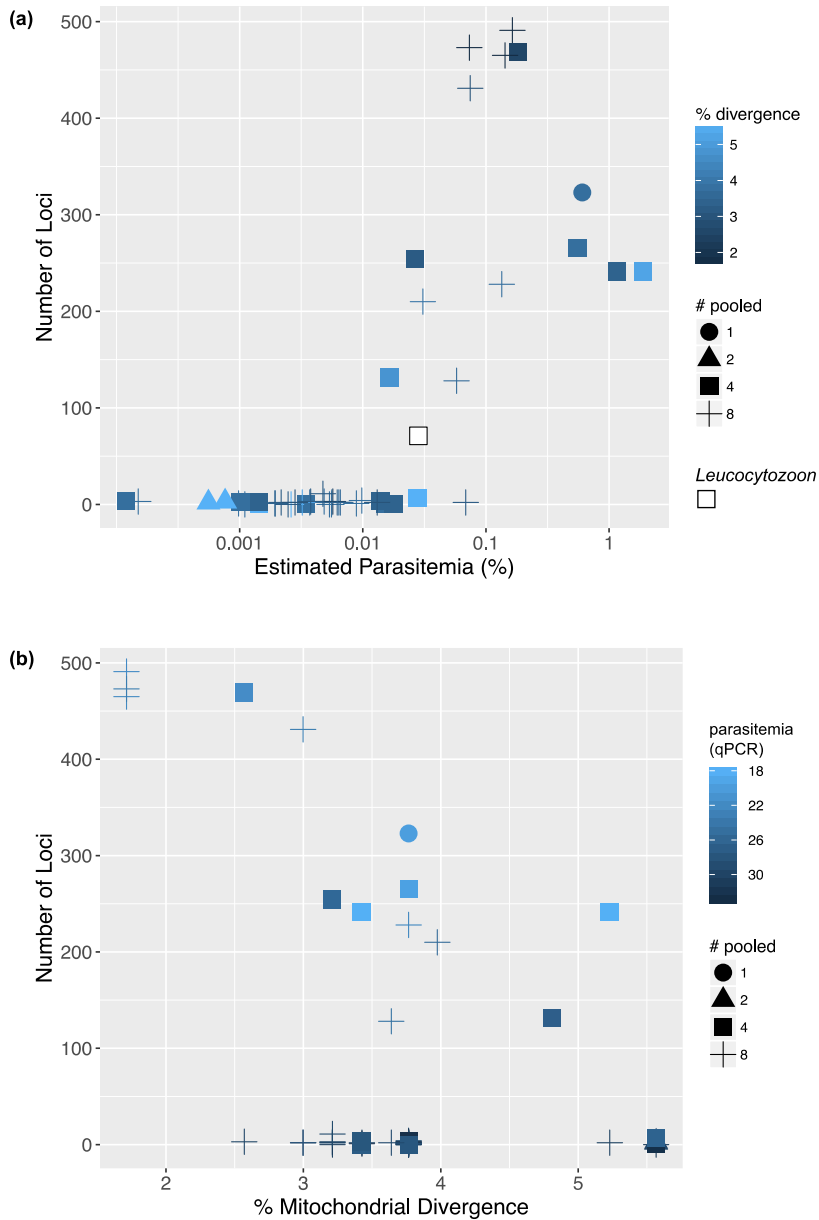

661  
662

SEQUENCE CAPTURE OF AVIAN BLOOD PARASITES

663 Fig. 3 Phylogenies estimated with nuclear (a, b) and mitochondrial (c, d) datasets. Blue tip labels  
 664 indicate reference samples. RAxML best trees are shown with branch lengths in substitutions per  
 665 site and RAxML bootstrap support above branches. (a, b) SVDquartets support values are shown  
 666 in bold below branches. Red tip labels indicate samples with mixed infections. (c, d) Branches  
 667 with support values <50 were collapsed. Branch lengths for G403 (*Leucocytozoon*) were reduced  
 668 to improve visualization.  
 669  
 670  
 671

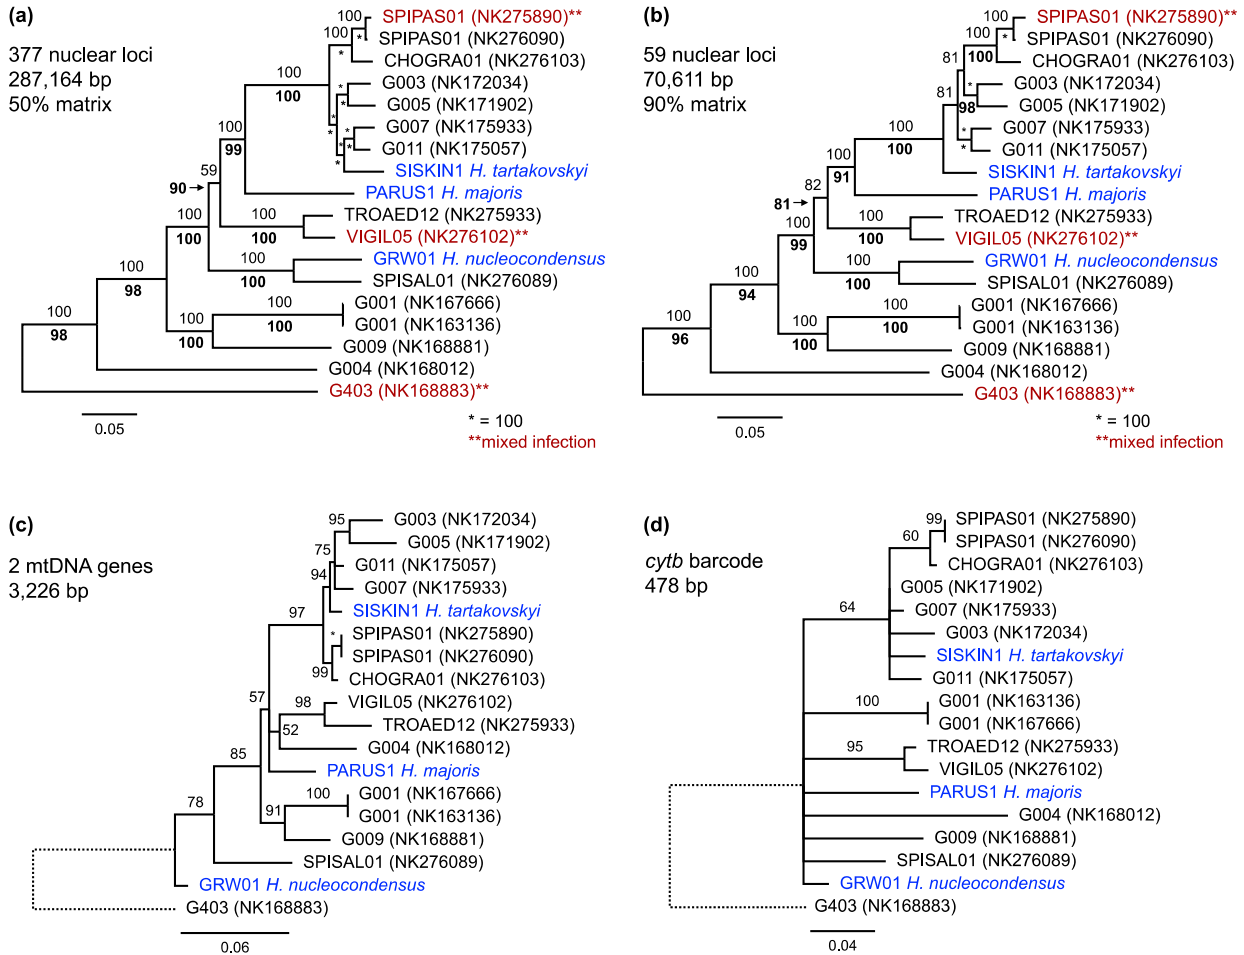

672  
 673
